# Supplementary material
Source: Springer Nature journal article supplement (https://www.springermedizin.de/resource/supplementary/12967_2013_1855_MOESM3_ESM.pdf/9574928)
Supplement: MOESM3 [file 9574928]

Household

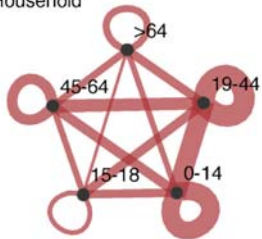

Hospital

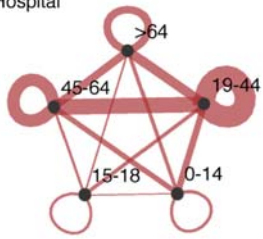

Jail

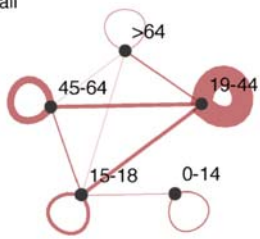

Nursing Home

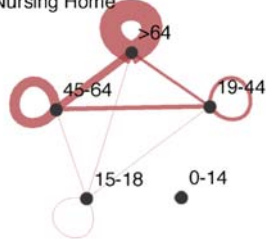

Out[1205]=

Gym and Sports

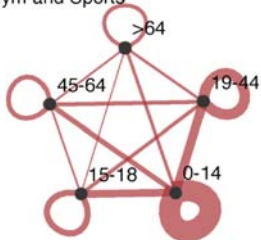

School/Daycare

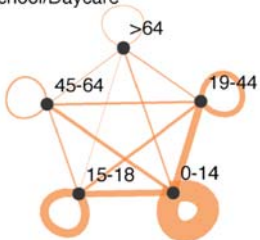

College Dorm

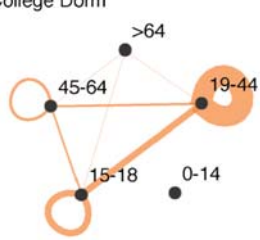

Work Place

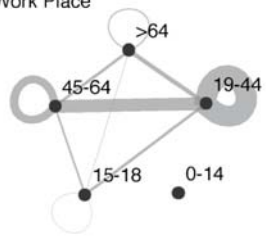

- Place/activity of high physical contact
- Place/activity of moderate physical contact
- Place/activity of negligible physical contact
